# Supplementary material for: Behavioural and neuroplastic effects of a double-blind randomised controlled balance exercise trial in people with Parkinson’s disease
Source: PubMed Central journal article supplement (PMC8782921; doi:10.1038/s41531-021-00269-5), 2022-01-21
Supplement: 41531_2021_269_MOESM1_ESM.pdf [file 41531_2021_269_MOESM1_ESM.pdf]

# Supplementary material to “Behavioural and neuroplastic effects of a double-blinded randomised controlled exercise trial in people with Parkinson’s disease”

## Table of Contents

|                                                                                                                                                                      |    |
|----------------------------------------------------------------------------------------------------------------------------------------------------------------------|----|
| Supplementary Table 1. Correlation matrix of all behavioural and BDNF outcomes. ....                                                                                 | 2  |
| Supplementary Table 2. Credibility assessments and expectations of the two interventions. ....                                                                       | 3  |
| Supplementary Table 3. Blinding of the assessors at the post intervention assessments. ....                                                                          | 4  |
| Supplementary Table 4. Medication changes over the course of the intervention. ....                                                                                  | 4  |
| Supplementary Table 5. Estimates of the MLM analyses based on the imputed data (by intention to treat). ....                                                         | 5  |
| Supplementary Figure 1: The f-values map of the striatum from the time by group interaction analysis. ....                                                           | 6  |
| Supplementary Table 6. Difference score correlations within the groups between the behavioural outcomes and the fMRI data and mBDNF. ....                            | 7  |
| Supplementary Table 7. Comparison of the difference score correlations between the behavioural outcomes and brain activity and mBDNF, over the groups. ....          | 7  |
| Supplementary Table 8. Estimates of the MLM analysis of the reaction time outcome of the serial reaction time task (motor learning task performed during fMRI). .... | 8  |
| Supplementary Table 9. Estimates of the MLM per protocol analyses. ....                                                                                              | 9  |
| Supplementary References .....                                                                                                                                       | 10 |

| Supplementary Table 1. Correlation matrix of all behavioural and BDNF outcomes. |       |       |       |       |       |       |       |       |       |       |       |       |       |       |       |       |       |       |
|---------------------------------------------------------------------------------|-------|-------|-------|-------|-------|-------|-------|-------|-------|-------|-------|-------|-------|-------|-------|-------|-------|-------|
|                                                                                 | 1     | 2     | 3     | 4     | 5     | 6     | 7     | 8     | 9     | 10    | 11    | 12    | 13    | 14    | 15    | 16    | 17    | 18    |
| <b>1. Mini-BESTest</b>                                                          | 1     | 0.47  | 0.52  | -0.56 | 0.38  | 0.26  | -0.37 | -0.42 | 0.53  | 0.26  | 0.35  | -0.17 | -0.07 | 0.03  | -0.4  | 0.45  | -0.29 | -0.18 |
| <b>2. Gait speed</b>                                                            | 0.47  | 1     | 0.89  | -0.49 | 0.45  | 0.25  | -0.29 | -0.34 | 0.44  | 0.26  | 0.14  | -0.08 | -0.12 | 0.11  | -0.22 | 0.37  | -0.32 | 0.06  |
| <b>3. Step length</b>                                                           | 0.52  | 0.89  | 1     | -0.5  | 0.49  | 0.25  | -0.38 | -0.39 | 0.47  | 0.22  | 0.14  | -0.12 | -0.12 | 0.12  | -0.27 | 0.43  | -0.34 | -0.01 |
| <b>4. Walk-12</b>                                                               | -0.56 | -0.49 | -0.5  | 1     | -0.34 | -0.25 | 0.39  | 0.63  | -0.79 | -0.21 | -0.25 | 0.03  | 0.09  | 0.01  | 0.72  | -0.73 | 0.69  | 0.48  |
| <b>5. Steps/day</b>                                                             | 0.38  | 0.45  | 0.49  | -0.34 | 1     | 0.25  | -0.23 | -0.33 | 0.27  | 0     | 0.08  | -0.13 | -0.09 | 0.03  | -0.24 | 0.23  | -0.2  | -0.04 |
| <b>6. Frändin-Grimby</b>                                                        | 0.26  | 0.25  | 0.25  | -0.25 | 0.25  | 1     | -0.11 | -0.16 | 0.07  | 0.13  | 0.22  | -0.11 | 0     | -0.17 | -0.11 | 0.25  | -0.23 | -0.05 |
| <b>7. MDS-UPDRS III</b>                                                         | -0.37 | -0.29 | -0.38 | 0.39  | -0.23 | -0.11 | 1     | 0.82  | -0.26 | -0.21 | -0.31 | 0.22  | 0.13  | -0.23 | 0.2   | -0.23 | 0.21  | 0.02  |
| <b>8. MDS-UPDRS total</b>                                                       | -0.42 | -0.34 | -0.39 | 0.63  | -0.33 | -0.16 | 0.82  | 1     | -0.51 | -0.15 | -0.24 | 0.2   | 0.22  | -0.03 | 0.57  | -0.5  | 0.54  | 0.38  |
| <b>9. ABC</b>                                                                   | 0.53  | 0.44  | 0.47  | -0.79 | 0.27  | 0.07  | -0.26 | -0.51 | 1     | 0.1   | 0.19  | 0.08  | -0.16 | -0.08 | -0.65 | 0.63  | -0.6  | -0.45 |
| <b>10. MoCA</b>                                                                 | 0.26  | 0.26  | 0.22  | -0.21 | 0     | 0.13  | -0.21 | -0.15 | 0.1   | 1     | 0.56  | -0.12 | 0.11  | 0     | -0.07 | 0.08  | -0.1  | 0.1   |
| <b>11. Executive function</b>                                                   | 0.35  | 0.14  | 0.14  | -0.25 | 0.08  | 0.22  | -0.31 | -0.24 | 0.19  | 0.56  | 1     | 0.01  | 0.09  | 0.11  | -0.14 | 0.13  | -0.24 | -0.1  |
| <b>12. proBDNF</b>                                                              | -0.17 | -0.08 | -0.12 | 0.03  | -0.13 | -0.11 | 0.22  | 0.2   | 0.08  | -0.12 | 0.01  | 1     | -0.16 | -0.04 | 0.06  | -0.15 | 0.28  | 0.08  |
| <b>13. mBDNF</b>                                                                | -0.07 | -0.12 | -0.12 | 0.09  | -0.09 | 0     | 0.13  | 0.22  | -0.16 | 0.11  | 0.09  | -0.16 | 1     | 0.06  | 0.13  | 0.03  | 0.02  | -0.04 |
| <b>14. Voice sound level</b>                                                    | 0.03  | 0.11  | 0.12  | 0.01  | 0.03  | -0.17 | -0.23 | -0.03 | -0.08 | 0     | 0.11  | -0.04 | 0.06  | 1     | 0.04  | 0.01  | 0.11  | 0.01  |
| <b>15. PDQ-39</b>                                                               | -0.4  | -0.22 | -0.27 | 0.72  | -0.24 | -0.11 | 0.2   | 0.57  | -0.65 | -0.07 | -0.14 | 0.06  | 0.13  | 0.04  | 1     | -0.65 | 0.66  | 0.74  |
| <b>16. EQ5D, VAS</b>                                                            | 0.45  | 0.37  | 0.43  | -0.73 | 0.23  | 0.25  | -0.23 | -0.5  | 0.63  | 0.08  | 0.13  | -0.15 | 0.03  | 0.01  | -0.65 | 1     | -0.65 | -0.6  |
| <b>17. HADS depression</b>                                                      | -0.29 | -0.32 | -0.34 | 0.69  | -0.2  | -0.23 | 0.21  | 0.54  | -0.6  | -0.1  | -0.24 | 0.28  | 0.02  | 0.11  | 0.66  | -0.65 | 1     | 0.65  |
| <b>18. HADS anxiety</b>                                                         | -0.18 | 0.06  | -0.01 | 0.48  | -0.04 | -0.05 | 0.02  | 0.38  | -0.45 | 0.1   | -0.1  | 0.08  | -0.04 | 0.01  | 0.74  | -0.6  | 0.65  | 1     |

All values are Pearson's correlation coefficients. The figures in the upper row correspond to the outcome name with the same figure presented in the left most column. Mini-BESTest = the Mini-Balance Evaluation Systems Test, Frändin-Grimby = the Frändin-Grimby scale, MDS-UPDRS = Movement Disorders Society - Unified Parkinson's Disease Rating Scale, MoCA = the Montreal Cognitive Assessment score ABC = the Activities-specific Balance Confidence Scale, proBDNF = precursor BDNF, mBDNF = mature BDNF, PDQ-39 = the Parkinson's Disease Questionnaire-39, EQ5D- VAS = the EuroQol 5 dimensions visual analogue scale, HADS = the Hospital Anxiety and Depression scale.

| Supplementary Table 2. Credibility assessments and expectations of the two interventions. |                        |                             |         |         |                     |
|-------------------------------------------------------------------------------------------|------------------------|-----------------------------|---------|---------|---------------------|
|                                                                                           | HiBalance<br>m<br>(sd) | Active control<br>m<br>(sd) | t-value | p-value | adjusted<br>p-value |
| <b>How successful symptom alleviation</b>                                                 | 6.6<br>(1.4)           | 5.8<br>(1.1)                | -3.1    | 0.0026  | 0.0070              |
| <b>Recommend to a friend</b>                                                              | 7.6<br>(1.2)           | 6.5<br>(1.3)                | -3.9    | 0.00021 | 0.0021              |
| <b>How much better (%)</b>                                                                | 53.3<br>(23)           | 55.1<br>(20)                | 0.4     | 0.69    | 0.69                |
| <b>Challenging tasks</b>                                                                  | 5.5<br>(1)             | 5<br>(1.6)                  | -1.6    | 0.11    | 0.14                |
| <b>Feels valuable to me</b>                                                               | 7.5<br>(1.2)           | 6.6<br>(1.6)                | -3      | 0.0035  | 0.0070              |
| <b>Enhance my memory</b>                                                                  | 5.3<br>(1.9)           | 5.9<br>(1.4)                | 1.7     | 0.094   | 0.14                |
| <b>Get to know my group members</b>                                                       | 5.9<br>(1.6)           | 6.3<br>(1.3)                | 1.2     | 0.22    | 0.25                |
| <b>Enhance my dual task ability</b>                                                       | 6<br>(1.4)             | 5.3<br>(1.7)                | -2      | 0.046   | 0.077               |
| <b>Benefit</b>                                                                            | 7.5<br>(1.2)           | 6.7<br>(1.3)                | -3.1    | 0.0027  | 0.0070              |
| <b>Motivation</b>                                                                         | 8.1<br>(1)             | 7.4<br>(1.2)                | -3      | 0.0035  | 0.0070              |

Questionnaire answered at week 3 to 4 into the interventions. Range 1-9 for all questions but “How much better” where percentage was used. The questionnaire was inspired by Borkovec and Nau.<sup>15</sup> P-values were adjusted using the false discovery rate with alpha = 0.05.

| Supplementary Table 3. Blinding of the assessors at the post intervention assessments.                                                                                                                                                                                                                                                                                                                                                                                                                                                                                                                                                                                                                                                                                                                                                                                                |                      |                            |                               |                   |                        |                       |
|---------------------------------------------------------------------------------------------------------------------------------------------------------------------------------------------------------------------------------------------------------------------------------------------------------------------------------------------------------------------------------------------------------------------------------------------------------------------------------------------------------------------------------------------------------------------------------------------------------------------------------------------------------------------------------------------------------------------------------------------------------------------------------------------------------------------------------------------------------------------------------------|----------------------|----------------------------|-------------------------------|-------------------|------------------------|-----------------------|
|                                                                                                                                                                                                                                                                                                                                                                                                                                                                                                                                                                                                                                                                                                                                                                                                                                                                                       | Knew before<br>n (%) | Guessed<br>before<br>n (%) | Correct guess before<br>n (%) | No guess<br>n (%) | Guessed after<br>n (%) | Not reported<br>n (%) |
| <b>Mini-BESTest</b>                                                                                                                                                                                                                                                                                                                                                                                                                                                                                                                                                                                                                                                                                                                                                                                                                                                                   | 5 (6.8)              | 1 (1.4)                    | 1 (1.4)                       | 44 (59.5)         | 9 (12.2)               | 15 (20.3)             |
| <b>MDS-UPDRS</b>                                                                                                                                                                                                                                                                                                                                                                                                                                                                                                                                                                                                                                                                                                                                                                                                                                                                      | 3 (4.1)              | 0 (0)                      | 0 (0)                         | 49 (66.2)         | 2 (2.7)                | 15 (20.3)             |
| <b>MRI</b>                                                                                                                                                                                                                                                                                                                                                                                                                                                                                                                                                                                                                                                                                                                                                                                                                                                                            | 3 (4.6)              | 4 (6.2)                    | 1 (1.5)                       | 24 (36.9)         | 32 (49.2)              | 12 (18.5)             |
| <b>Speech,<br/>cognition</b>                                                                                                                                                                                                                                                                                                                                                                                                                                                                                                                                                                                                                                                                                                                                                                                                                                                          | 6 (9.2)              | 9 (13.8)                   | 8 (12.3)                      | 43 (66.2)         | 9 (13.8)               | 6 (9.2)               |
| <p>All blinding scores were reported at the end of the assessment. Knew before = the assessor knew group allocation before the post assessment started, Guessed before = the assessor guessed group allocation based in information obtained before the post assessment started, Correct guess before = the assessor was right in the guessed group allocation based on information obtained before the post assessment started, No guess = the assessor had no guess on group allocation either before the start or at the end of the post assessment, Guessed after = the assessor obtained a guess on group allocation at the end of the post assessment, Not reported = missing blinding score. Mini-BESTest = the Mini-Balance Evaluation Systems Test, MDS-UPDRS = Movement Disorders Society - Unified Parkinson's Disease Rating Scale, MRI = magnetic resonance imaging.</p> |                      |                            |                               |                   |                        |                       |

| Supplementary Table 4. Medication changes over the course of the intervention.       |                             |                                  |         |         |
|--------------------------------------------------------------------------------------|-----------------------------|----------------------------------|---------|---------|
|                                                                                      | HiBalance group<br>(n = 40) | Active control group<br>(n = 35) | t-value | p-value |
| <b>Number of participants who increased their medication during the intervention</b> | 5                           | 6                                |         |         |
| <b>Increase mg, m (sd)</b>                                                           | 89.6 (23.3)                 | 105.7 (35.4)                     | 0.4     | 0.39    |
| <b>Number of participants who decreased their medication during the intervention</b> | 1                           | 1                                |         |         |
| <b>Decrease mg (m)</b>                                                               | -93.0                       | -49.5                            |         |         |
| mg = milligram, m = mean, sd = standard deviation.                                   |                             |                                  |         |         |

Supplementary Table 5. Estimates of the MLM analyses based on the imputed data (by intention to treat).

|                           |          | Group                      |       | Time                        |         | Group x Time               |        | Intercept                     |          |
|---------------------------|----------|----------------------------|-------|-----------------------------|---------|----------------------------|--------|-------------------------------|----------|
|                           | reg      | b<br>(95% CI)              | P     | b<br>(95% CI)               | P       | b<br>(95% CI)              | P      | b<br>(95% CI)                 | P        |
| <b>Mini-BESTest</b>       | lin.     | -0.3<br>(-1.7, 1)          | 0.65  | 0.6<br>(-0.4, 1.6)          | 0.22    | 0.4<br>(-1, 1.9)           | 0.57   | 21<br>(20, 21.9)              | < 0.0001 |
| <b>Gait speed</b>         | lin.     | 0.9<br>(-6.8, 8.5)         | 0.82  | 2.4<br>(-3.3, 8.1)          | 0.41    | 4.4<br>(-3.2, 12.1)        | 0.25   | 118.9<br>(113.5, 124.4)       | < 0.0001 |
| <b>Step length</b>        | lin.     | 0.5<br>(-3, 4.1)           | 0.77  | 1.1<br>(-1.8, 4)            | 0.47    | 1.1<br>(-2.3, 4.5)         | 0.53   | 64.4<br>(61.9, 67)            | < 0.0001 |
| <b>Walk 12</b>            | poiss.   | 0.2<br>(-0.2, 0.5)         | 0.31  | 0<br>(-0.2, 0.2)            | 0.89    | -0.1<br>(-0.4, 0.1)        | 0.29   | 2.1<br>(1.9, 2.4)             | < 0.0001 |
| <b>Steps/day</b>          | log lin. | -0.1<br>(-0.3, 0.2)        | 0.66  | 0<br>(-0.1, 0.2)            | 0.65    | -0.1<br>(-0.4, 0.2)        | 0.47   | 8.5<br>(8.3, 8.7)             | < 0.0001 |
| <b>Frändin -Grimby</b>    | binom.   | -0.1<br>(-1.2, 1.1)        | 0.92  | -0.5<br>(-1.6, 0.7)         | 0.43    | 0.9<br>(-0.8, 2.6)         | 0.30   | -0.6<br>(-1.4, 0.3)           | 0.19     |
| <b>MDS-UPDRS III</b>      | lin.     | -0.5<br>(-5.1, 4)          | 0.82  | -1.9<br>(-5.5, 1.7)         | 0.30    | -0.4<br>(-5.5, 4.6)        | 0.87   | 31.8<br>(28.5, 35)            | < 0.0001 |
| <b>MDS-UPDRS Tot.</b>     | lin.     | 0.5<br>(-6.4, 7.5)         | 0.88  | -3<br>(-8, 1.9)             | 0.28    | -0.3<br>(-7.6, 6.9)        | 0.93   | 50.4<br>(45.5, 55.4)          | < 0.0001 |
| <b>ABC</b>                | beta     | -0.1<br>(-0.6, 0.4)        | 0.73  | 0.1<br>(-0.1, 0.3)          | 0.019   | 0.2<br>(-0.1, 0.4)         | 0.27   | 1.7<br>(1.3, 2.1)             | < 0.0001 |
| <b>Executive function</b> | lin.     | 1.3<br>(0.2, 2.4)          | 0.024 | 0.6<br>(-0.1, 1.4)          | 0.10    | 0.2<br>(-0.8, 1.1)         | 0.75   | -0.7<br>(-1.5, 0.1)           | 0.090    |
| <b>mBDNF</b>              | lin.     | 196.3<br>(-3095.1, 3487.8) | 0.91  | -369.5<br>(-2409.5, 1670.6) | 0.72    | 106.8<br>(-2752.6, 2966.3) | 0.94   | 38071.9<br>(35714.7, 40429.1) | < 0.0001 |
| <b>Voice sound level</b>  | lin.     | -0.5<br>(-2.1, 1.2)        | 0.58  | 2<br>(1.1, 2.9)             | <0.0001 | -2.1<br>(-3.4, -0.9)       | 0.0012 | 70.9<br>(69.7, 72)            | < 0.0001 |
| <b>PDQ-39</b>             | poiss.   | 0.2<br>(-0.1, 0.6)         | 0.16  | -0.2<br>(-0.4, 0.1)         | 0.16    | -0.1<br>(-0.4, 0.2)        | 0.56   | 2.7<br>(2.4, 2.9)             | < 0.0001 |
| <b>EQ5D VAS</b>           | beta     | -0.4<br>(-0.9, 0)          | 0.044 | 0<br>(-0.2, 0.3)            | 0.037   | 0.2<br>(-0.1, 0.5)         | 0.26   | 1.3<br>(1, 1.7)               | < 0.0001 |
| <b>HADS Depression</b>    | poiss.   | 0.1<br>(-0.3, 0.5)         | 0.59  | 0<br>(-0.3, 0.3)            | 0.95    | -0.1<br>(-0.4, 0.3)        | 0.79   | 0.9<br>(0.7, 1.2)             | < 0.0001 |
| <b>HADS Anxiety</b>       | poiss.   | 0.2<br>(-0.2, 0.5)         | 0.34  | 0.1<br>(-0.2, 0.4)          | 0.46    | -0.1<br>(-0.5, 0.2)        | 0.38   | 1.1<br>(0.9, 1.4)             | < 0.0001 |
| <b>proBDNF (pg/ml)</b>    | lin.     | 0.6<br>(-0.4, 1.6)         | 0.21  | 0.5<br>(-0.3, 1.3)          | 0.26    | -0.3<br>(-1.3, 0.7)        | 0.54   | 5.1<br>(4.4, 5.9)             | < 0.0001 |
| <b>ratioBDNF (pg/ml)</b>  | lin.     | 0.2<br>(-0.2, 0.5)         | 0.31  | 0.1<br>(-0.2, 0.4)          | 0.43    | -0.1<br>(-0.5, 0.3)        | 0.51   | -9.1<br>(-9.3, -8.8)          | < 0.0001 |

The column reg. defines the type of multilevel model (mlm) used for the outcome; lin. = linear, log lin. = linear mlm on logged values, binom. = logistic, poiss. = poisson, beta = mlm based on beta regression. Mini-BESTest = the Mini-Balance Evaluation Systems Test, Frändin-Grimby = the Frändin-Grimby scale, MDS-UPDRS = Movement Disorders Society - Unified Parkinson's Disease Rating Scale, ABC = the Activities-specific Balance Confidence Scale, mBDNF = mature BDNF, PDQ-39 = the Parkinson's Disease Questionnaire-39, EQ5D- VAS = the EuroQol 5 dimensions visual analogue scale, HADS = the Hospital Anxiety and Depression scale, proBDNF = precursor BDNF, ratioBDNF = proBDNF/mBDNF.

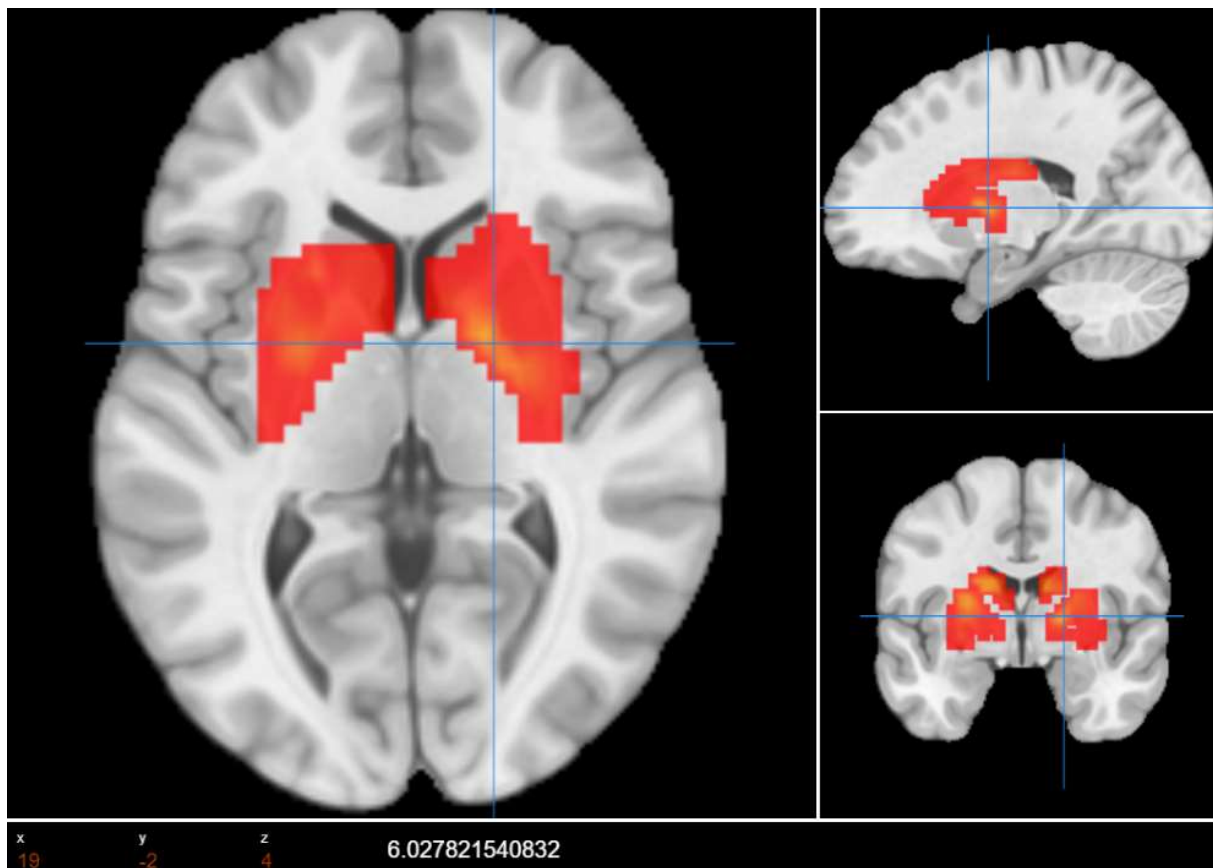

Supplementary Figure 1: The f-values map of the striatum from the time by group interaction analysis. A more yellow colour indicates a higher f-value, range: 0 (deepest red) to 8.9 (brightest yellow). Contrast: sequence trial blocks/random trial blocks. An interactive whole brain f-values map from the time by group interaction analysis can be found here: <https://neurovault.org/collections/DORLUDYE/>

Supplementary Table 6. Difference score correlations within the groups between the behavioural outcomes and the fMRI data and mBDNF.

|                         |                | Mini-BESTest |      |        | Gait speed |      |        | Executive function |      |        |
|-------------------------|----------------|--------------|------|--------|------------|------|--------|--------------------|------|--------|
|                         | group          | rho          | p    | adj. p | rho        | p    | adj. p | rho                | p    | adj. p |
| <b>Striatum</b>         | HiBalance      | -0.06        | 0.75 | 0.97   | -0.10      | 0.58 | 0.97   | -0.09              | 0.64 | 0.97   |
|                         | Active control | 0.13         | 0.50 | 0.97   | 0.24       | 0.22 | 0.97   | -0.03              | 0.89 | 0.97   |
| <b>Primary motor c.</b> | HiBalance      | 0.02         | 0.91 | 0.97   | 0.06       | 0.75 | 0.97   | 0.21               | 0.26 | 0.97   |
|                         | Active control | -0.11        | 0.57 | 0.97   | 0.19       | 0.34 | 0.97   | 0.03               | 0.87 | 0.97   |
| <b>Premotor c.</b>      | HiBalance      | 0.06         | 0.75 | 0.97   | 0.14       | 0.45 | 0.97   | 0.10               | 0.61 | 0.97   |
|                         | Active control | 0.04         | 0.83 | 0.97   | 0.26       | 0.18 | 0.97   | 0.00               | 0.99 | 0.99   |
| <b>Suppl. motor c.</b>  | HiBalance      | 0.03         | 0.87 | 0.97   | 0.05       | 0.77 | 0.97   | -0.07              | 0.71 | 0.97   |
|                         | Active control | -0.02        | 0.91 | 0.97   | 0.24       | 0.21 | 0.97   | 0.11               | 0.58 | 0.97   |
| <b>ACC</b>              | HiBalance      | 0.16         | 0.41 | 0.97   | -0.2       | 0.28 | 0.97   | -0.03              | 0.88 | 0.97   |
|                         | Active control | -0.16        | 0.56 | 0.97   | 0.46       | 0.02 | 0.54   | -0.15              | 0.47 | 0.97   |
| <b>DLPFC</b>            | HiBalance      | 0.18         | 0.33 | 0.97   | -0.15      | 0.41 | 0.97   | 0.09               | 0.63 | 0.97   |
|                         | Active control | 0.07         | 0.71 | 0.97   | 0.29       | 0.14 | 0.97   | -0.01              | 0.97 | 0.99   |
| <b>mBDNF</b>            | HiBalance      | 0.03         | 0.86 | 0.86   | 0.17       | 0.39 | 0.86   | 0.09               | 0.64 | 0.86   |
|                         | Active control | 0.05         | 0.83 | 0.86   | -0.20      | 0.37 | 0.86   | -0.07              | 0.76 | 0.86   |

rho = Spearman's rank order correlation coefficients. adj. p = false discovery rate adjusted p (alpha = 0.05). Primary motor c. = Primary motor cortex, Suppl. motor c. = Supplementary motor cortex, ACC = anterior cingulate cortex, DLPFC = dorsolateral prefrontal cortex, mBDNF = mature BDNF.

Supplementary Table 7. Comparison of the difference score correlations between the behavioural outcomes and brain activity and mBDNF, over the groups.

|                         |  | Mini-BESTest |      |        | Gait speed |       |        | Executive function |      |        |
|-------------------------|--|--------------|------|--------|------------|-------|--------|--------------------|------|--------|
|                         |  | z            | p    | adj. p | z          | p     | adj. p | z                  | p    | adj. p |
| <b>Striatum</b>         |  | 0.72         | 0.47 | 0.71   | 1.29       | 0.20  | 0.59   | 0.21               | 0.83 | 0.83   |
| <b>Primary motor c.</b> |  | 0.49         | 0.63 | 0.84   | 0.48       | 0.63  | 0.84   | 0.65               | 0.51 | 0.84   |
| <b>Premotor c.</b>      |  | 0.06         | 0.95 | 0.95   | 0.47       | 0.63  | 0.84   | 0.34               | 0.73 | 0.84   |
| <b>Suppl. Motor c.</b>  |  | 0.20         | 0.85 | 0.91   | 0.72       | 0.47  | 0.84   | 0.65               | 0.51 | 0.84   |
| <b>DLPFC</b>            |  | 0.40         | 0.69 | 0.84   | 1.67       | 0.10  | 0.72   | 0.36               | 0.72 | 0.84   |
| <b>ACC</b>              |  | 0.99         | 0.32 | 0.84   | 2.70       | 0.010 | 0.10   | 0.43               | 0.66 | 0.84   |
| <b>mBDNF</b>            |  | 0.05         | 0.96 | 1.0    | 1.25       | 1.0   | 1.0    | 0.53               | 0.59 | 1.0    |

z = estimates of the Fischer's Z significance tests. adj. p = false discovery rate adjusted p (alpha = 0.05). Primary motor c. = Primary motor cortex, Suppl. motor c. = Supplementary motor cortex, ACC = anterior cingulate cortex, DLPFC = dorsolateral prefrontal cortex, mBDNF = mature BDNF.

Supplementary Table 8. Estimates of the MLM analysis of the reaction time outcome of the serial reaction time task (motor learning task performed during fMRI).

| Seq.                    |          | Group                   |          | Time                    |          | Seq. x Time x Group     |          | Seq. x Group            |          | Seq. x time             |          | Group x time            |          | Trial order             |          | Intercept               |          |
|-------------------------|----------|-------------------------|----------|-------------------------|----------|-------------------------|----------|-------------------------|----------|-------------------------|----------|-------------------------|----------|-------------------------|----------|-------------------------|----------|
| <b>b</b><br><b>(ci)</b> | <b>p</b> | <b>b</b><br><b>(ci)</b> | <b>p</b> | <b>b</b><br><b>(ci)</b> | <b>p</b> | <b>b</b><br><b>(ci)</b> | <b>p</b> | <b>b</b><br><b>(ci)</b> | <b>p</b> | <b>b</b><br><b>(ci)</b> | <b>p</b> | <b>b</b><br><b>(ci)</b> | <b>p</b> | <b>b</b><br><b>(ci)</b> | <b>p</b> | <b>b</b><br><b>(ci)</b> | <b>p</b> |
| -0.01                   | 0.020    | -0.01                   | 0.63     | -0.03                   | < 0.0001 | 0                       | 0.53     | 0.01                    | 0.23     | -0.01                   | 0.00030  | 0.01                    | 0.035    | 0                       | < 0.0001 | 0.63                    | < 0.0001 |
| (-0, -0)                |          | (-0, 0)                 |          | (0, 0)                  |          | (0, 0)                  |          | (-0, 0)                 |          | (-0, -0)                |          | (0, 0)                  |          | (0, 0)                  |          | (0.6, 0.7)              |          |

Seq. = type of block (hidden sequence or random trials), b = unstandardised estimates.



Supplementary Table 9. Estimates of the MLM per protocol analyses.

|                            | reg       | Group                  |       | Time                        |        | Group x Time               |        | Intercept                   |          |
|----------------------------|-----------|------------------------|-------|-----------------------------|--------|----------------------------|--------|-----------------------------|----------|
|                            |           | b (95% CI)             | P     | b (95% CI)                  | P      | b (95% CI)                 | P      | b (95% CI)                  | P        |
| <b>Mini-BESTest</b>        | lin.      | -0.3<br>(-1.8, 1.1)    | 0.68  | 0.4<br>(-0.4, 1.2)          | 0.30   | 0.5<br>(-0.6, 1.5)         | 0.37   | 21.4<br>(20.4, 22.5)        | < 0.0001 |
| <b>Gait speed (m/sec)</b>  | lin.      | 0.002<br>(-0.08, 0.09) | 0.95  | 0.01<br>(-0.03, 0.05)       | 0.58   | 0.05<br>(-0.002, 0.1)      | 0.061  | 1.2<br>(1.2, 1.3)           | < 0.0001 |
| <b>Step length</b>         | lin.      | 0.6<br>(-3.4, 4.5)     | 0.78  | 0.6<br>(-0.9, 2.1)          | 0.45   | 1.3<br>(-0.8, 3.4)         | 0.22   | 65.6<br>(62.7, 68.5)        | < 0.0001 |
| <b>Walk 12</b>             | poiss.    | 0.1<br>(-0.3, 0.5)     | 0.50  | 0<br>(-0.1, 0.2)            | 0.90   | -0.1<br>(-0.3, 0.1)        | 0.27   | 2<br>(1.7, 2.3)             | < 0.0001 |
| <b>Steps/day</b>           | log lin.  | -0.1<br>(-0.4, 0.2)    | 0.64  | 0<br>(-0.1, 0.1)            | 0.63   | -0.1<br>(-0.2, 0.1)        | 0.31   | 8.6<br>(8.4, 8.8)           | < 0.0001 |
| <b>Frändin -Grimby</b>     | binom.    | 0<br>(-1.4, 1.3)       | 0.96  | -0.6<br>(-1.9, 0.6)         | 0.30   | 1<br>(-0.6, 2.7)           | 0.23   | -0.4<br>(-1.5, 0.6)         | 0.39     |
| <b>MDS-UPDRS III</b>       | lin.      | 1.2<br>(-4, 6.5)       | 0.64  | -1.7<br>(-5.1, 1.8)         | 0.35   | -0.9<br>(-5.7, 3.8)        | 0.70   | 30.4<br>(26.6, 34.2)        | < 0.0001 |
| <b>MDS-UPDRS Tot.</b>      | lin.      | 2.2<br>(-5.8, 10.3)    | 0.59  | -3.5<br>(-7.7, 0.7)         | 0.11   | 0<br>(-5.8, 5.8)           | 0.99   | 49.3<br>(43.4, 55.2)        | < 0.0001 |
| <b>ABC</b>                 | beta      | -0.1<br>(-0.7, 0.5)    | 0.68  | 0<br>(-0.2, 0.3)            | 0.66   | 0.2<br>(-0.1, 0.4)         | 0.26   | 1.9<br>(1.5, 2.3)           | < 0.0001 |
| <b>Executive functions</b> | lin.      | 1.1<br>(-0.1, 2.3)     | 0.073 | 0.6<br>(0.2, 1.1)           | 0.011  | 0.2<br>(-0.5, 0.8)         | 0.62   | -0.5<br>(-1.4, 0.4)         | 0.26     |
| <b>mBDNF</b>               | lin.      | 293.5<br>(-2779, 3366) | 0.85  | -276.5<br>(-2103.5, 1550.5) | 0.77   | 238.3<br>(-2241.8, 2718.5) | 0.85   | 36678.1<br>(34434.3, 38922) | < 0.0001 |
| <b>Voice int</b>           | lin.      | -0.2<br>(-2, 1.6)      | 0.79  | 2<br>(1.1, 2.9)             | 0.0001 | -2.2<br>(-3.5, -0.9)       | 0.0012 | 71<br>(69.7, 72.3)          | < 0.0001 |
| <b>PDQ-39</b>              | log. lin. | 0.2<br>(-0.2, 0.6)     | 0.29  | -0.2<br>(-0.3, 0)           | 0.053  | -0.1<br>(-0.3, 0.2)        | 0.58   | 2.7<br>(2.4, 3)             | < 0.0001 |
| <b>EQ5D VAS</b>            | beta      | -0.4<br>(-0.9, 0.1)    | 0.082 | 0<br>(-0.2, 0.3)            | 0.75   | 0.2<br>(-0.2, 0.5)         | 0.27   | 1.3<br>(1, 1.7)             | < 0.0001 |
| <b>HADS dep.</b>           | poiss.    | 0<br>(-0.4, 0.5)       | 0.85  | 0<br>(-0.3, 0.2)            | 0.80   | 0<br>(-0.3, 0.4)           | 0.94   | 0.9<br>(0.6, 1.3)           | < 0.0001 |
| <b>HADS anx.</b>           | poiss.    | 0.2<br>(-0.2, 0.6)     | 0.28  | 0<br>(-0.2, 0.3)            | 0.69   | -0.1<br>(-0.4, 0.2)        | 0.47   | 1.1<br>(0.8, 1.4)           | < 0.0001 |
| <b>proBDNF (pg/ml)</b>     | lin.      | 0.2<br>(-1, 1.4)       | 0.76  | 0.3<br>(0, 0.5)             | 0.054  | -0.3<br>(-0.7, 0)          | 0.085  | 5.7<br>(4.8, 6.6)           | < 0.0001 |
| <b>ratioBDNF (pg/ml)</b>   | lin.      | 0<br>(-1.2, 1.3)       | 0.95  | 0.2<br>(0, 0.5)             | 0.058  | -0.3<br>(-0.6, 0)          | 0.10   | -4.8<br>(-5.8, -3.9)        | < 0.0001 |

The column reg. defines the type of multilevel model (mlm) used for the outcome; lin. = linear, log lin. = linear mlm on logged values, binom. = logistic, poiss. = poisson, beta = mlm based on beta regression. Mini-BESTest = the Mini-Balance Evaluation Systems Test, Frändin-Grimby = the Frändin-Grimby scale, MDS-UPDRS = Movement Disorders Society - Unified Parkinson's Disease Rating Scale, ABC = the Activities-specific Balance Confidence Scale, mBDNF = mature BDNF, PDQ-39 = the Parkinson's Disease Questionnaire-39, EQ5D- VAS = the EuroQol 5 dimensions visual analogue scale, HADS = the Hospital Anxiety and Depression scale, proBDNF = precursor BDNF, ratioBDNF = proBDNF/mBDNF.

## Supplementary References

- 1 Franchignoni, F., Horak, F., Godi, M., Nardone, A. & Giordano, A. Using psychometric techniques to improve the Balance Evaluation Systems Test: the mini-BESTest. *J. Rehabil. Med.* **42**, 323-331, doi:10.2340/16501977-0537 (2010).
- 2 Lofgren, N., Lenholm, E., Conradsson, D., Stahle, A. & Franzen, E. The Mini-BESTest-a clinically reproducible tool for balance evaluations in mild to moderate Parkinson's disease? *BMC Neurol.* **14**, 235, doi:10.1186/s12883-014-0235-7 (2014).
- 3 Bladh, S. *et al.* Psychometric performance of a generic walking scale (Walk-12G) in multiple sclerosis and Parkinson's disease. *J. Neurol.* **259**, 729-738, doi:10.1007/s00415-011-6254-z (2012).
- 4 Grimby, G. & Frandin, K. On the use of a six-level scale for physical activity. *Scand. J. Med. Sci. Sports* **28**, 819-825, doi:10.1111/sms.12991 (2018).
- 5 Goetz, C. G. *et al.* Movement Disorder Society-sponsored revision of the Unified Parkinson's Disease Rating Scale (MDS-UPDRS): scale presentation and clinimetric testing results. *Mov. Disord.* **23**, 2129-2170, doi:10.1002/mds.22340 (2008).
- 6 Hoehn, M. M. & Yahr, M. D. Parkinsonism: onset, progression and mortality. *Neurology* **17**, 427-442, doi:10.1212/wnl.17.5.427 (1967).
- 7 Powell, L. E. & Myers, A. M. The Activities-specific Balance Confidence (ABC) Scale. *J. Gerontol. A Biol. Sci. Med. Sci.* **50A**, M28-34, doi:10.1093/gerona/50a.1.m28 (1995).
- 8 Weschler, D. *Wechsler Adult Intelligence Scale - Fourth Edition.* (Stat Solut, 2008).
- 9 Delis, D. C., Kaplan, E. & Kramer, J. H. *Delis-Kaplan executive function system: Examiner's manual.*, (The Psychological Corporation, 2001).
- 10 Jenkinson, C., Fitzpatrick, R., Peto, V., Greenhall, R. & Hyman, N. The Parkinson's Disease Questionnaire (PDQ-39): development and validation of a Parkinson's disease summary index score. *Age Ageing* **26**, 353-357, doi:10.1093/ageing/26.5.353 (1997).
- 11 EuroQolGroup. EuroQol - a new facility for the measurement of health-related quality of life. *Health Policy* **16**, 199-208, doi:10.1016/0168-8510(90)90421-9 (1990).
- 12 Rodriguez-Blazquez, C. *et al.* Psychometric attributes of the Hospital Anxiety and Depression Scale in Parkinson's disease. *Mov. Disord.* **24**, 519-525, doi:10.1002/mds.22321 (2009).
- 13 Nissen, M. J. & Bullemer, P. Attentional Requirements of Learning - Evidence from Performance-Measures. *Cogn. Psychol.* **19**, 1-32, doi:10.1016/0010-0285(87)90002-8 (1987).
- 14 Freidle, M. *et al.* Measuring implicit sequence learning and dual task ability in mild to moderate Parkinson s disease: A feasibility study. *PLoS One* **16**, e0251849, doi:10.1371/journal.pone.0251849 (2021).
- 15 Borkovec, T. D. & Nau, S. D. Credibility of analogue therapy rationales. *J. Behav. Ther. Exp. Psychiatry* **3**, 257-260, doi:10.1016/0005-7916(72)90045-6 (1972).
- 16 R: A Language and Environment for Statistical Computing (R Foundation for Statistical Computing, Vienna, Austria, 2020).
